# Supplementary material
Source: Springer Nature journal article supplement (https://mijn.bsl.nl/resource/supplementary/13047_2011_460_MOESM3_ESM.pdf/7111726)

95% CI Shoe length minus foot length [mm]

17  
16  
15  
14  
13  
12  
11

Non – diabetic participants

Diabetic participants

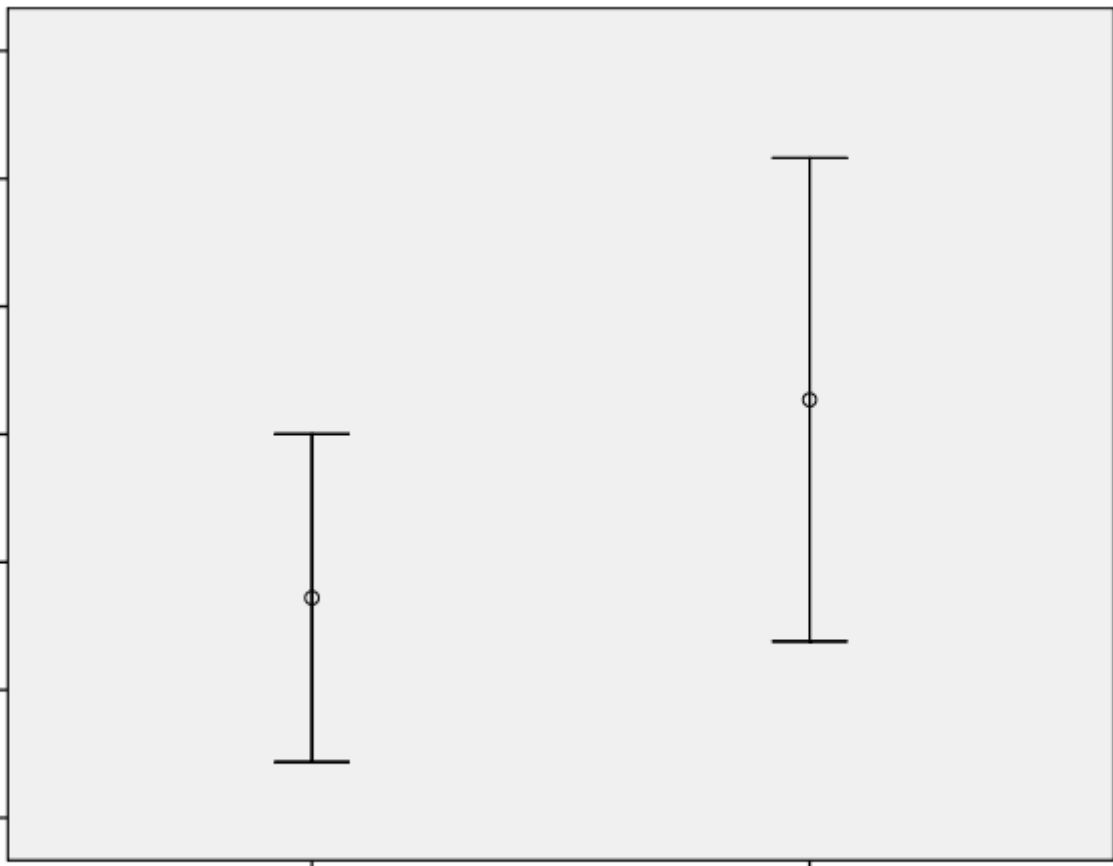

Supplement: MOESM3 [file 7111726]
